# Supplementary material for: On the Choice of Longitudinal Models for the Analysis of Antitumor Efficacy in Mouse Clinical Trials of Patient-derived Xenograft Models
Source: Cancer Res Commun. 2023 Jan 26;3(1):140–7. doi: 10.1158/2767-9764.CRC-22-0238 (PMC10035449; doi:10.1158/2767-9764.CRC-22-0238)
Supplement: Supplementary Data S3 — Linear mixed-effects regression model [file crc-22-0238-s03.docx]

**S3.** **Linear mixed-effects regression model**

Nested random effects

with i= 1,…, 225 mice, j= 1, …, ni measured at times tij and k=1, …, 25 PDX models
